# Supplementary material for: Creation of CuOx/ZSM-5 zeolite complex: healing defect sites and boosting acidic stability and catalytic activity
Source: Royal Society of Chemistry journal article supplement (doi:10.1039/d0cy00978d), 2020-01-01
Supplement: d0cy00978d1.pdf [file d0cy00978d1.pdf]

## Supporting information for

### Creation of CuO<sub>x</sub>/ZSM-5 Zeolite Complex: Healing Defect sites, Boosting Acidic Stability and Catalytic Activity

*Luoming Zhang<sup>a</sup>, Yanjun Gong<sup>a\*</sup>, Yanliang Zhai<sup>a</sup>, Tong Ma<sup>a</sup>, Chunfang Xu<sup>a</sup>, Shouwei Zuo<sup>b</sup>,  
Lirong Zheng<sup>b</sup>, Jing Zhang<sup>b\*</sup>, LiuPing<sup>c</sup>*

<sup>a</sup>State Key Laboratory of Heavy Oil Processing, The Key Laboratory of Catalysis of CNPC,  
China University of Petroleum-Beijing

<sup>b</sup>Beijing Synchrotron Radiation Laboratory, Institute of High Energy Physics, Chinese Academy  
of Sciences, University of Chinese Academy of Sciences Beijing, China

<sup>c</sup>State Key Laboratory of Coal Conversion, Institute of Coal Chemistry, Chinese Academy of  
Sciences

\*Correspondence: gongyj@cup.edu.cn

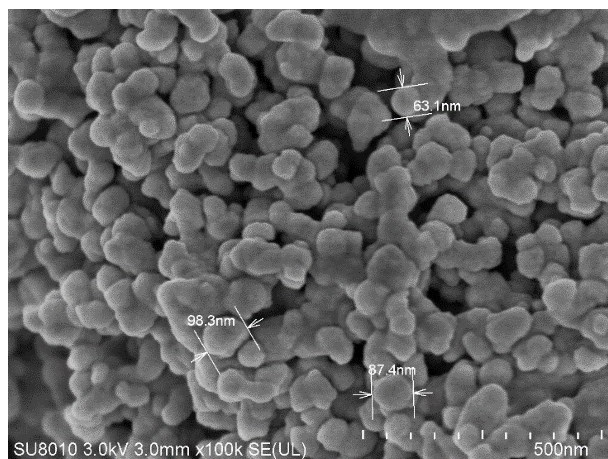

**Figure S1.** SEM images of the parent CuO particles, size of 60-100 nm

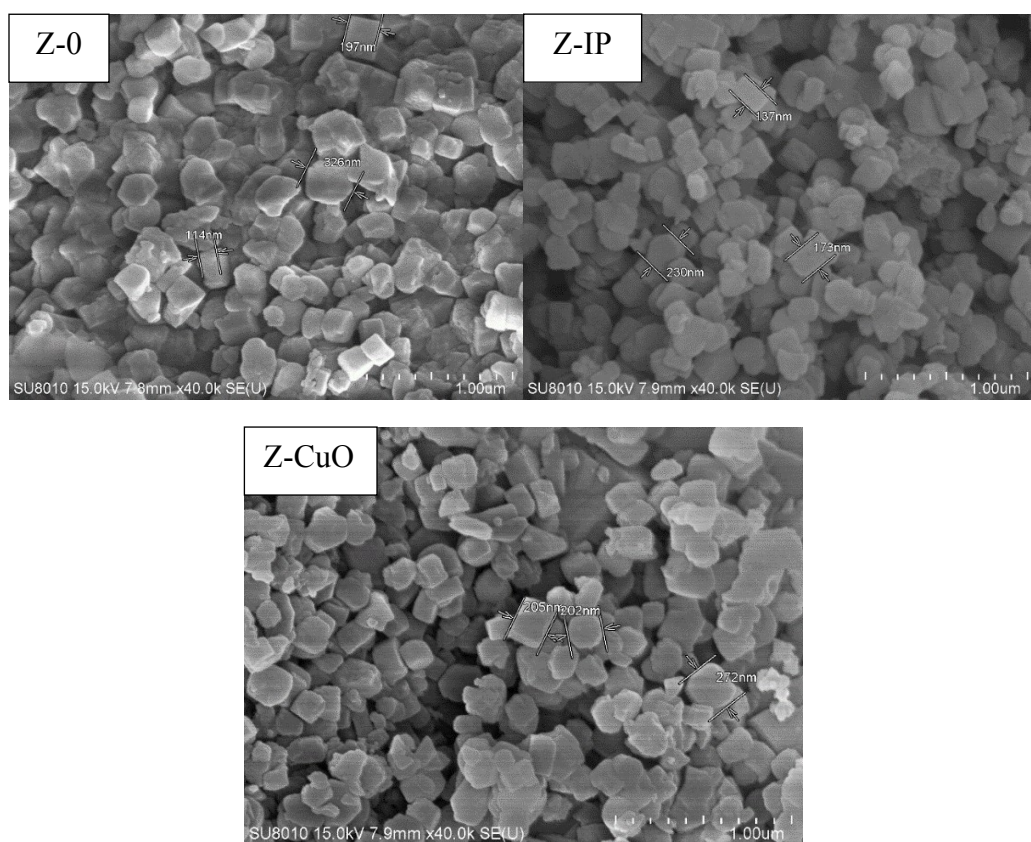

**Figure S2.** SEM images of Z-0 and two modified ZSM-5 samples (Z-IP and Z-CuO)

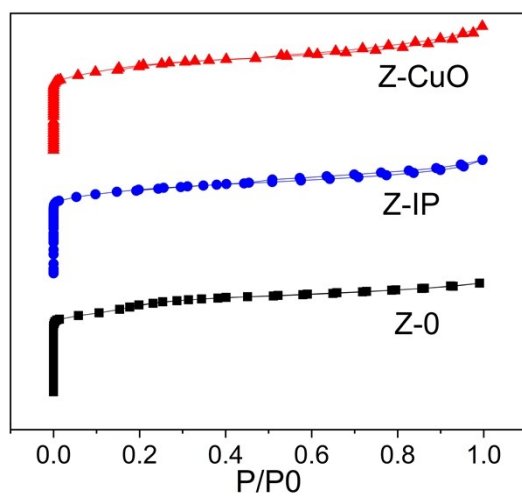

**Figure S3.** N<sub>2</sub> adsorption/desorption isotherms of Z-0 and two modified ZSM-5 samples (Z-IP and Z-CuO)

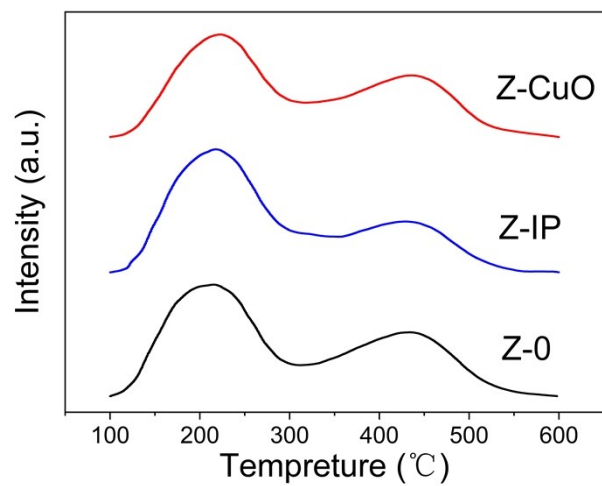

**Figure S4.** NH<sub>3</sub>-TPD profiles of Z-0, Z-CuO and Z-IP

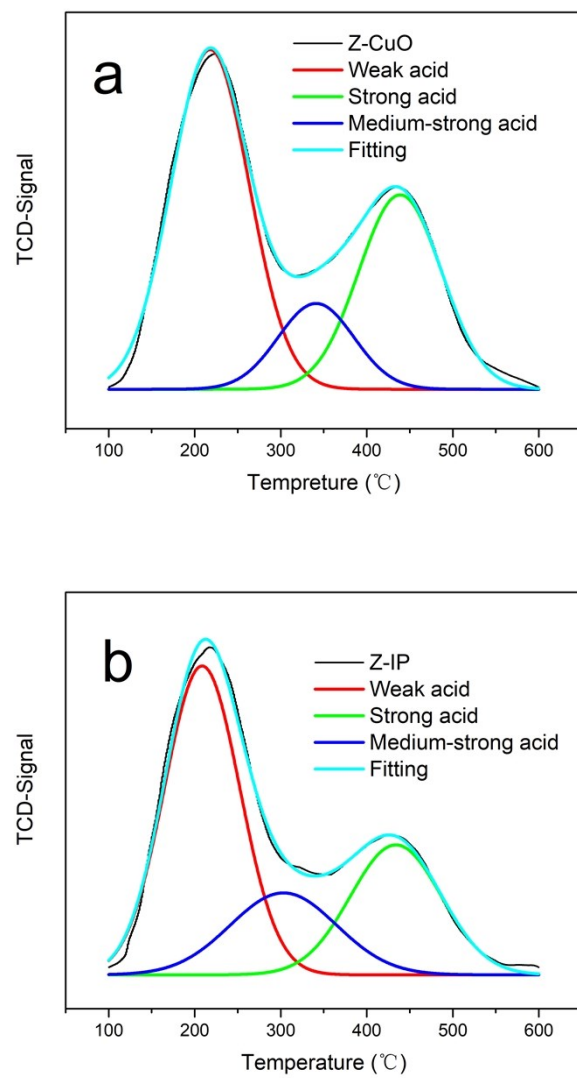

**Figure S5.** Fitting results of NH<sub>3</sub>-TPD profiles of Z-CuO (a), and Z-IP (b)

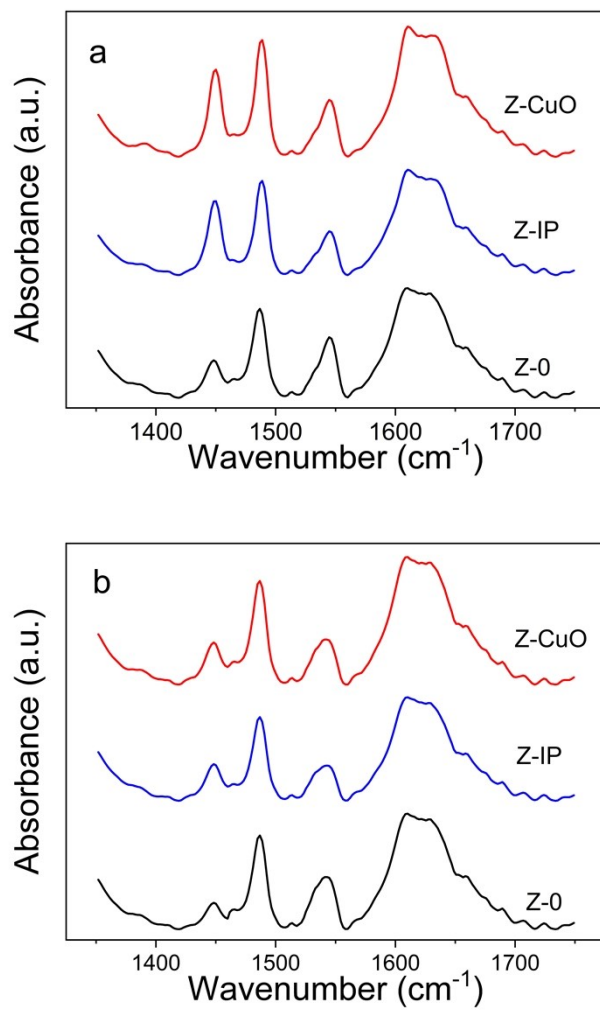

**Figure S6.** Py-IR profiles of Z-0, Z-CuO, and Z-IP, Desorption at 250°C (a) and 350 °C (b)

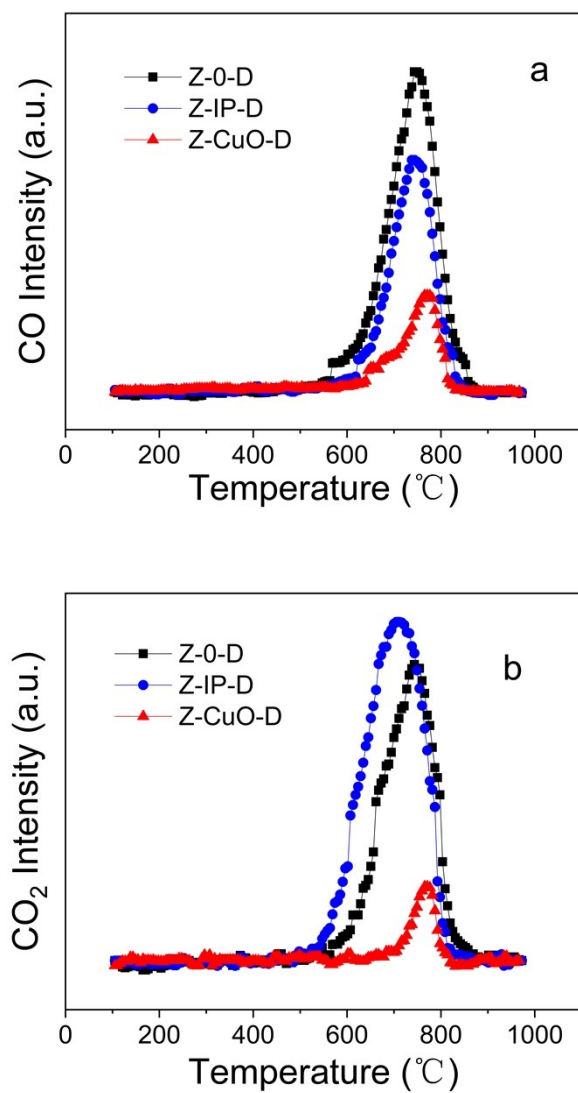

**Figure S7.** TPO-MS image of deactivated samples, CO peak (a) and CO<sub>2</sub> peak (b)

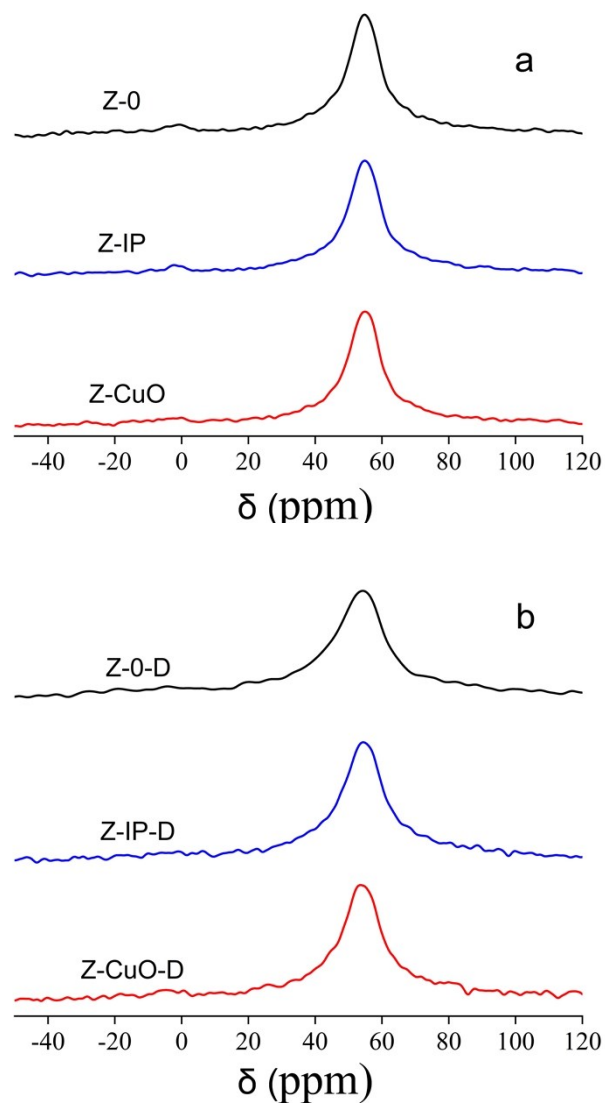

**Figure S8.**  $^{27}\text{Al}$  MAS NMR spectra of the parent and two modified ZSM-5 samples (Z-IP and Z-CuO) before reaction (a) and after reaction (b)

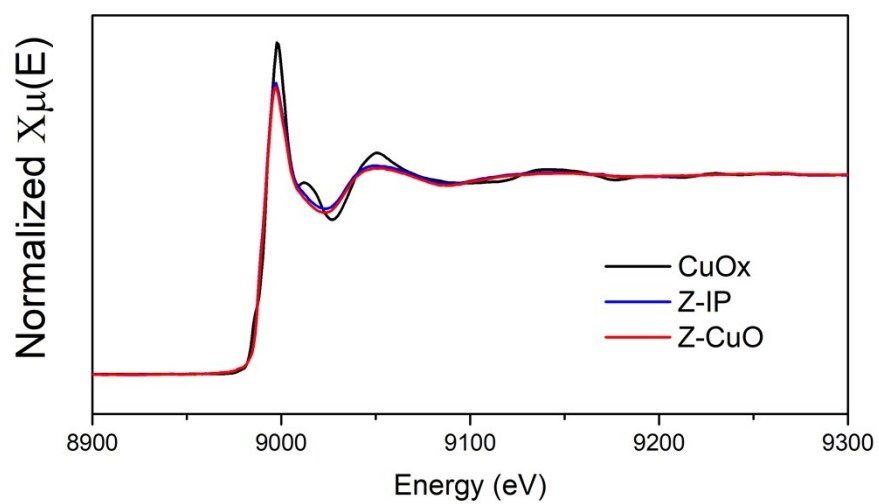

**Figure S9.** XANES spectra of CuO (black), Z-IP (blue), and Z-CuO (red)

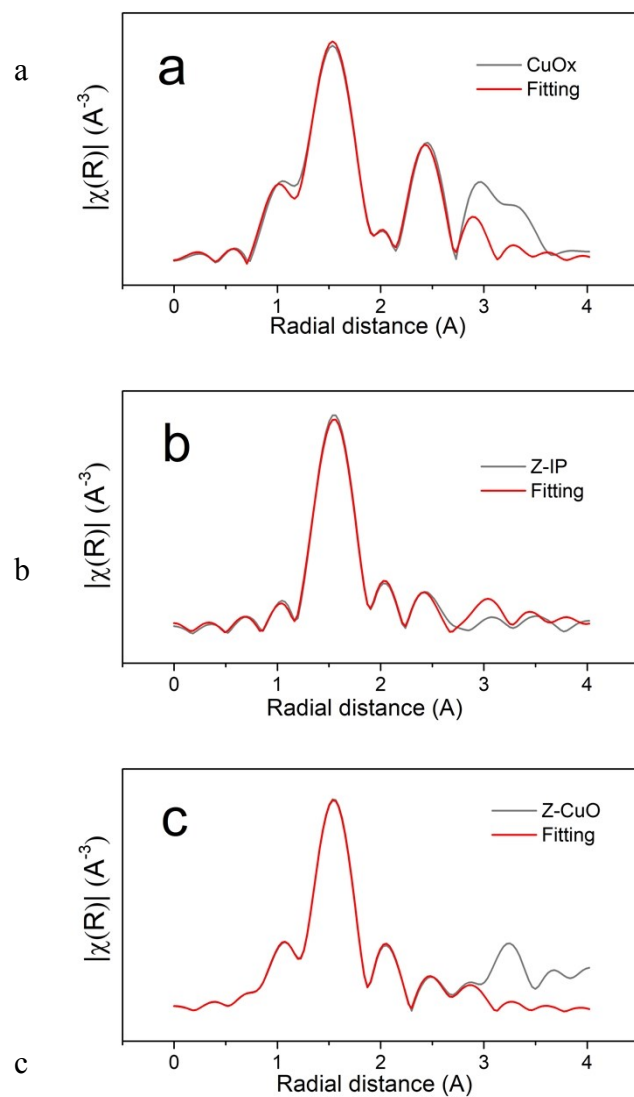

**Figure S10.** EXAFS fitting spectra of  $\text{CuO}_x$  (a), Z-IP (b), and Z-CuO (c)

**Table S1.** Textural properties of Z and Z-IP and Z-CuO samples.

| Sample | $S_{\text{BET}}$             | $S_{\text{micro}}$ | $S_{\text{Ext}}$ | $V_{\text{mic}}$ | Average<br>Pore Size | Most<br>probable<br>Pore Size | Medium<br>Pore Size |
|--------|------------------------------|--------------------|------------------|------------------|----------------------|-------------------------------|---------------------|
|        | $(\text{m}^2 \text{g}^{-1})$ |                    |                  |                  | $(\text{nm})$        |                               |                     |
| Z-0    | 414                          | 348                | 65               | 0.156            | 2.15                 | 0.67                          | 0.68                |
| Z-IP   | 411                          | 353                | 58               | 0.149            | 2.25                 | 0.66                          | 0.68                |
| Z-CuO  | 407                          | 345                | 62               | 0.151            | 2.49                 | 0.69                          | 0.70                |

**Table S2.** Acid property of samples obtained by NH<sub>3</sub>-TPD measurement

| Sample | Peak position (°C) |                    |             | Acid amount (mmol g <sup>-1</sup> ) |                    |             |       |
|--------|--------------------|--------------------|-------------|-------------------------------------|--------------------|-------------|-------|
|        | Weak acid          | Medium strong acid | Strong acid | Weak acid                           | Medium Strong acid | Strong acid | Total |
| Z-0    | 210.8              | 313.2              | 421.3       | 0.812                               | 0.120              | 0.545       | 1.477 |
| Z-IP   | 208.7              | 303.3              | 433.9       | 0.771                               | 0.289              | 0.391       | 1.451 |
| Z-CuO  | 217.9              | 341.1              | 438.8       | 0.814                               | 0.200              | 0.496       | 1.508 |

**Table S3.** Amount of carbon deposition on the spent samples calculated by TPO-MS

| Sample  | Area (a. u.) |                 |                    | Coke amount<br>(Carbon wt%) |
|---------|--------------|-----------------|--------------------|-----------------------------|
|         | CO           | CO <sub>2</sub> | CO+CO <sub>2</sub> |                             |
| Z-0-D   | 60.464       | 17.789          | 78.253             | 5.87                        |
| Z-IP-D  | 40.149       | 24.073          | 64.222             | 4.87                        |
| Z-CuO-D | 16.180       | 2.188           | 18.368             | 1.11                        |

**Table. S4** Acid properties of the parent and samples Z-IP and Z-CuO after steaming treatment

| Sample   | Peak position (°C) |                    |             | Retention rate of Acid amount (%) |                    |             |       |
|----------|--------------------|--------------------|-------------|-----------------------------------|--------------------|-------------|-------|
|          | Weak acid          | Medium strong acid | Strong acid | Weak acid                         | Medium Strong acid | Strong acid | Total |
| Z-0-ST   | 186.25             | 253.69             | 327.82      | 20.07                             | 25.21              | 30.10       | 24.77 |
| Z-IP-ST  | 190.36             | 245.47             | 324.29      | 20.25                             | 26.43              | 36.26       | 28.16 |
| Z-CuO-ST | 190.35             | 269.52             | 314.346     | 24.81                             | 34.73              | 44.03       | 34.26 |

**Table. S5** Al and Cu concentration of samples before reaction and after regeneration

| Sample  | Concentration (mg/g) |       |
|---------|----------------------|-------|
|         | Al                   | Cu    |
| Z-IP    | 18.342               | 3.887 |
| Z-CuO   | 18.308               | 3.936 |
| Z-IP-R  | 15.399               | 2.137 |
| Z-CuO-R | 16.502               | 3.744 |

**Table. S6** Cu K-edge XANES and EXAFS fit parameters of samples<sup>[a]</sup>

| Catalysts | Edge energy (eV) | Contribution | N     | R(Å)  | $\Delta\sigma^2 \cdot 10^3 (\text{\AA}^2)$ | E0     |
|-----------|------------------|--------------|-------|-------|--------------------------------------------|--------|
| Z-IP      | 8989.9           | O            | 2.539 | 1.957 | 0.41                                       | -0.190 |
|           |                  | O            | 1.147 | 2.731 | 3.30                                       | 9.998  |
|           |                  | Cu           | 1.000 | 2.878 | 10.40                                      | -2.000 |
| Z-CuO     | 8989.7           | O            | 3.484 | 1.952 | 2.93                                       | -5.120 |
|           |                  | O            | 1.637 | 2.791 | 10.50                                      | -1.244 |
|           |                  | Cu           | 1.000 | 2.897 | 20.03                                      | -9.998 |
| Z-IP-R    | 8989.7           | O            | 4.231 | 1.926 | 2.99                                       | 3.750  |
|           |                  | O            | 1.375 | 2.706 | 20.00                                      | 9.999  |
|           |                  | Cu           | 9.577 | 2.997 | 20.01                                      | 9.156  |
| Z-CuO-R   | 8989.8           | O            | 2.928 | 1.977 | 2.98                                       | -1.750 |
|           |                  | O            | 1.725 | 2.655 | 20.00                                      | 9.997  |
|           |                  | Cu           | 2.182 | 2.897 | 20.00                                      | -9.998 |

[a] N, coordination number; R, distance between absorber and back scatterer atoms.
